# Supplementary material for: An HBV-tolerant immunocompetent model that effectively simulates chronic hepatitis B virus infection in mice
Source: PubMed Central journal article supplement — Exp Anim. 2016 Jun 6;65(4):373–82. doi: 10.1538/expanim.16-0013 (PMC5111840; doi:10.1538/expanim.16-0013), 2016-06-06
Supplement: expanim-65-373-s001.pdf [file expanim-65-373-s001.pdf]

## Supplement figures and figure legends

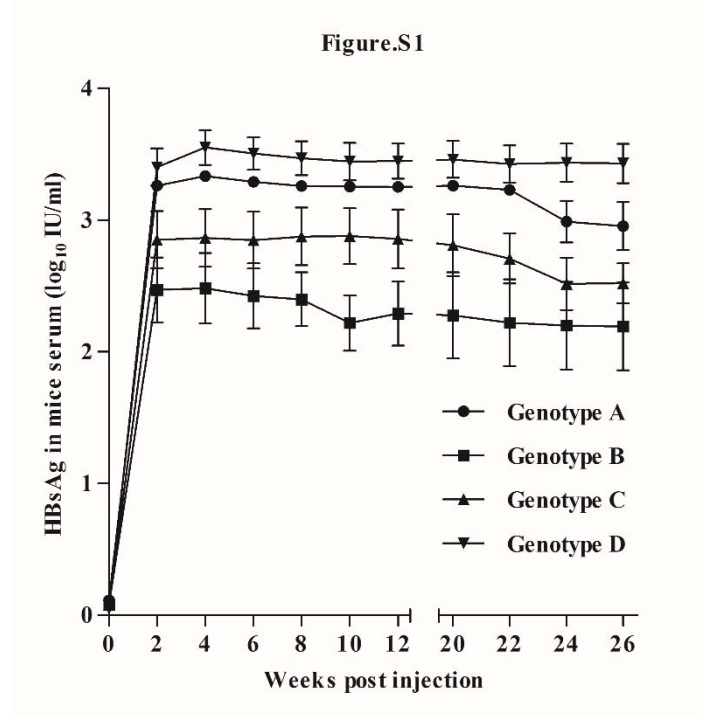

**Figure. S1** HBsAg level in serum of AAVS1 mice injected with pAAV plasmid carried different genotypes HBV. Genotype A (pAAV-HBV48), Genotype B (pAAV -C4371), Genotype C (pAAV -Y1021), Genotype D (pAAV -Y10), n=8, all male, for each group.

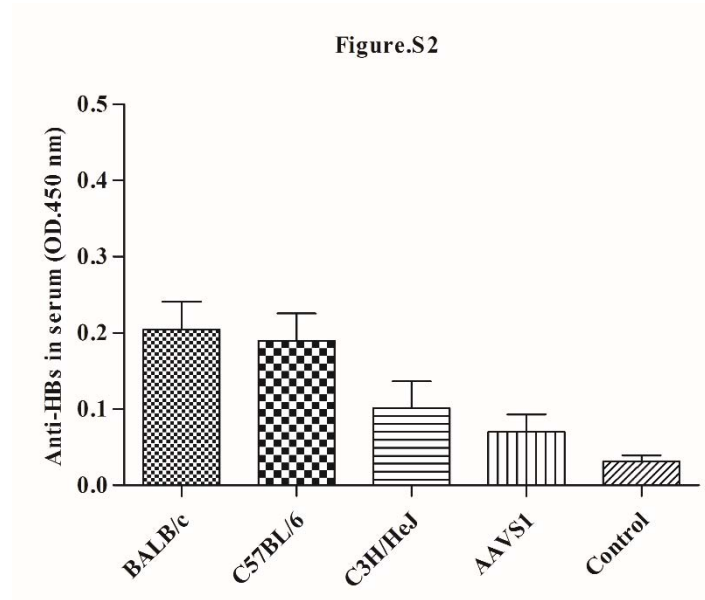

**Figure. S2 Anti-HBs level in mice serum.** The 4 different strains of mice were injected with pAAV-HBV and pAAV inject AAVS1 mice as control. Serum anti-HBs level were detected at 30 days post injection, n=8, all male, for each group.

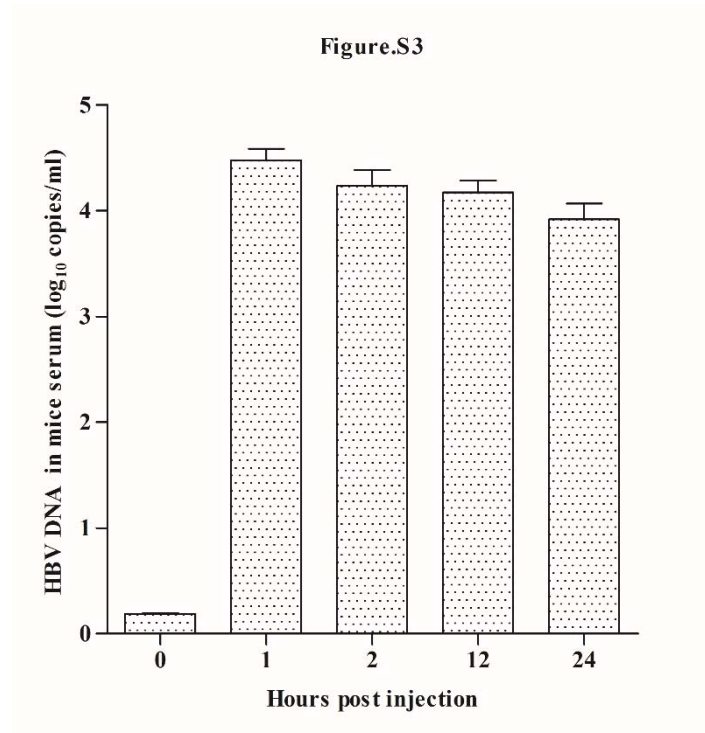

**Figure. S3** Remained plasmid DNA in serum of HDI AAVS1 mice. 5 groups of AAVS1 mice. Bleed and detect HBV DNA in mice serum at different time-points before or in the 24 after injection of pAAV-HBV, n=6, all male, for each group.

Figure. S4

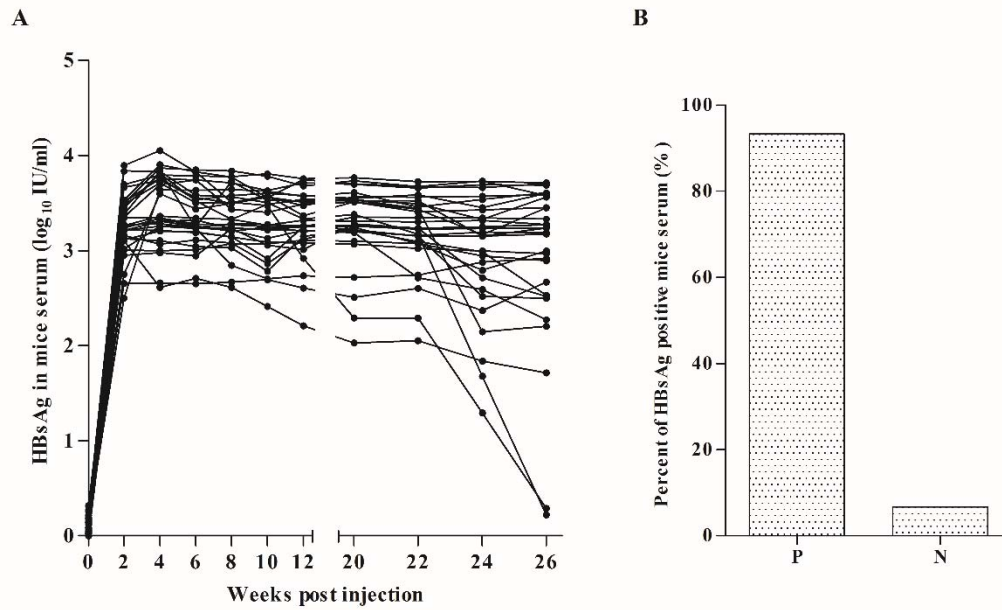

**Figure. S4 Percentage of mice with persisted viremia in a bigger group. (A) HBsAg level of 30 male AAVS1 mice after injection of pAAV-HBV. 28 of 30 mice sustained expression of HBsAg in the 26 weeks post injection. (B) Percentage of HBsAg positive mice at 26 weeks after injection. P= HBsAg positive mice (serum HBsAg level > 10 IU/mL), N= HBsAg negative mice (serum HBsAg level < 10 IU/mL).**
